# Supplementary material
Source: publisher site journal article supplement (https://www.dovepress.com/article/367187)
Supplement: Supplementary file 1 [file get_supplementary_file.php]

Table S1: Distribution of patients according to their responses to knowledge items about HTN (N=342)

| **KNOWLEDGE ITEMS** | | **Answer** | **Frequency** | **Percent** |
| --- | --- | --- | --- | --- |
| Hypertension is considered as | Chronic disease | Correct | 276 | 80.7 |
| Curable disease | Wrong | 42 | 12.3 |
| Don't know | Wrong | 24 | 7.0 |
| Hypertension belongs to the diseases of | Cardiovascular system | Correct | 268 | 78.4 |
| Neurological system | Wrong | 38 | 11.1 |
| Don't know | Wrong | 36 | 10.5 |
| The normal range of blood pressure is | 150/90 | Wrong | 14 | 4.1 |
| 120/80 | Correct | 301 | 88.0 |
| 60/30 | Wrong | 1 | .3 |
| Don't know | Wrong | 26 | 7.6 |
| The main symptom of hypertension is | Weight loss | Wrong | 13 | 3.8 |
| Headache | Correct | 274 | 80.1 |
| Thirst | Wrong | 17 | 5.0 |
| Don't know | Wrong | 38 | 11.1 |
| A predisposing factor of hypertension | Infection | Wrong | 13 | 3.8 |
| Obesity | Correct | 270 | 78.9 |
| Regular exercise | Wrong | 5 | 1.5 |
| Don't know | Wrong | 54 | 15.8 |
| Risk of hypertension can be reduced by | Immunization | Wrong | 3 | .9 |
| Weight loss | Correct | 277 | 81.0 |
| Hand wash | Wrong | 3 | .9 |
| Don't know | Wrong | 59 | 17.3 |
| The main cause of hypertension is | Anemia | Wrong | 8 | 2.3 |
| Atherosclerosis | Correct | 243 | 71.1 |
| Excessive sweets intake | Wrong | 25 | 7.3 |
| Don't know | Wrong | 66 | 19.3 |
| The complication of hypertension is | Pneumonia | Wrong | 19 | 5.6 |
| Osteoporosis | Wrong | 4 | 1.2 |
| Sudden death | Correct | 272 | 79.5 |
| Don't know | Wrong | 47 | 13.7 |
| Can hypertension be treated by [Regular intake of medication ] | No | Wrong | 2 | .6 |
| Yes | Correct | 335 | 98.0 |
| Don't Know | Wrong | 5 | 1.5 |
| Can hypertension be treated by? [Garlic intake ] | No | Correct | 115 | 33.6 |
| Yes | Wrong | 138 | 40.4 |
| Don't Know | Wrong | 89 | 26.0 |
| Can hypertension be treated by? [Traditional medicine] | No | Correct | 136 | 39.8 |
| Yes | Wrong | 58 | 17.0 |
| Don't Know | Wrong | 148 | 43.3 |
| The appropriate diet for hypertension is | Low fruit diet | Wrong | 5 | 1.5 |
| Low salt diet | Correct | 328 | 95.9 |
| Don't know | Wrong | 9 | 2.6 |

Table S2 : Distribution of patients according to their responses to attitude items about HTN along with the respective mean score and standard deviation (N=342)

| **ATTITUDE ITEMS** | | | **Frequency** | **Percent** | **Mean** | **Std. Deviation** |
| --- | --- | --- | --- | --- | --- | --- |
| **Included in Scoring System for Attitude** | You should check your blood pressure regularly | Strongly disagree | 2 | .6 | 4.32 | .76 |
| Disagree | 11 | 3.2 |
| Neutral | 16 | 4.7 |
| Agree | 160 | 46.8 |
| Strongly agree | 153 | 44.7 |
| You should check your lipid panel regularly | Strongly disagree | 0 | .0 | 4.21 | .81 |
| Disagree | 17 | 5.0 |
| Neutral | 33 | 9.6 |
| Agree | 154 | 45.0 |
| Strongly agree | 138 | 40.4 |
| It is better to have a normal body weight to be protected from hypertension | Strongly disagree | 4 | 1.2 | 4.37 | .82 |
| Disagree | 11 | 3.2 |
| Neutral | 18 | 5.3 |
| Agree | 132 | 38.6 |
| Strongly agree | 177 | 51.8 |
| You should follow your physician's instructions to have a controlled hypertension | Strongly disagree | 7 | 2.0 | 4.28 | .88 |
| Disagree | 9 | 2.6 |
| Neutral | 29 | 8.5 |
| Agree | 132 | 38.6 |
| Strongly agree | 165 | 48.2 |
| Regular exercise can improve your health | Strongly disagree | 1 | .3 | 4.59 | .59 |
| Disagree | 2 | .6 |
| Neutral | 5 | 1.5 |
| Agree | 121 | 35.4 |
| Strongly agree | 213 | 62.3 |
| Increasing salt and sugar intake is beneficial for health | Strongly disagree | 218 | 63.7 | 4.38 | 1.01 |
| Disagree | 76 | 22.2 |
| Neutral | 15 | 4.4 |
| Agree | 26 | 7.6 |
| Strongly agree | 7 | 2.0 |
| Fast foods (burgers, potatoes' chips...) cause health problems (like hypertension) | Strongly disagree | 7 | 2.0 | 4.31 | .88 |
| Disagree | 8 | 2.3 |
| Neutral | 28 | 8.2 |
| Agree | 128 | 37.4 |
| Strongly agree | 171 | 50.0 |
| **Excluded from Scoring System for Attitude** | Smoking causes health problems | Strongly disagree | 96 | 28.1 | 2.62 | 1.33 |
| Disagree | 76 | 22.2 |
| Neutral | 59 | 17.3 |
| Agree | 83 | 24.3 |
| Strongly agree | 28 | 8.2 |
| Taking treatment regularly can make hypertension a chronic disease | Strongly disagree | 21 | 6.1 | 2.04 | 1.13 |
| Disagree | 17 | 5.0 |
| Neutral | 49 | 14.3 |
| Agree | 123 | 36.0 |
| Strongly agree | 132 | 38.6 |
| Fruits and vegetable intake is beneficial for health | Strongly disagree | 2 | .6 | 4.11 | .88 |
| Disagree | 21 | 6.1 |
| Neutral | 42 | 12.3 |
| Agree | 150 | 43.9 |
| Strongly agree | 127 | 37.1 |

Table S3: Distribution of patients according to their responses to practice items about HTN (N=342)

| **PRACTICE ITEMS** | | | **Answer** | **Frequency** | **Percent** |
| --- | --- | --- | --- | --- | --- |
| **Included in Scoring System for Practice** | Do you take your medication regularly? | No | Wrong | 31 | 9.1 |
| Yes | Correct | 311 | 90.9 |
| Do you follow a regular continuous exercise? | No | Wrong | 257 | 75.1 |
| Yes | Correct | 85 | 24.9 |
| Do you check your blood pressure regularly? | No | Wrong | 187 | 54.7 |
| Yes | Correct | 155 | 45.3 |
| Do you follow a low salt diet? | No | Wrong | 106 | 31.0 |
| Yes | Correct | 236 | 69.0 |
| Do you try to reduce your weight? | No | Wrong | 163 | 47.7 |
| Yes | Correct | 179 | 52.3 |
| Do you try to avoid physical and emotional stress? | No | Wrong | 101 | 29.5 |
| Yes | Correct | 241 | 70.5 |
| Do you follow a low fat diet? | No | Wrong | 107 | 31.3 |
| Yes | Correct | 235 | 68.7 |

| **Excluded in Scoring System for Practice** | Do you take your medication by yourself (without someone's assistance)? | No | 41 | 12.0 |
| --- | --- | --- | --- | --- |
| Yes | 301 | 88.0 |
| Are the medications expensive? | No | 171 | 50.0 |
| Yes | 171 | 50.0 |
| How do you check your blood pressure? | using own sphygmomanometer with one of your relatives | 305 | 89.2 |
| At private clinic | 88 | 25.7 |
| At public health center | 51 | 14.9 |
| At pharmacy | 54 | 15.8 |
| By near health care worker | 46 | 13.5 |
| At hospital | 38 | 11.1 |

**Table S4: Factors Affecting HTN-Related Knowledge Score (Bivariate analyses)**

| **Factors** | | **N** | **Mean** | **Std. Deviation** | **Minimum** | **Maximum** | **P.value** |
| --- | --- | --- | --- | --- | --- | --- | --- |
|
| **Nationality** | Lebanese | 336 | 9.06 | 2.10 | 2 | 12 | 0.319 |
| Syrian | 6 | 8.67 | 0.82 | 8 | 10 |
| **Governorate** | Beirut | 45 | 9.11 | 1.812 | 4 | 12 | 0.053 |
| Mount Lebanon | 115 | 9.22 | 2.270 | 3 | 12 |
| South Lebanon | 20 | 8.25 | 2.124 | 3 | 12 |
| Nabatieh | 12 | 9.67 | 1.775 | 7 | 12 |
| Beqaa | 75 | 8.83 | 2.043 | 2 | 12 |
| Baalbeck El Hermel | 12 | 9.83 | 1.337 | 8 | 12 |
| North Lebanon | 37 | 8.57 | 2.035 | 3 | 12 |
| Akkar | 26 | 9.50 | 2.025 | 2 | 12 |
| **Governorate** | Beirut | 45 | 9.11 | 1.812 | 4 | 12 | 0.455 |
| Mount Lebanon | 115 | 9.22 | 2.270 | 3 | 12 |
| South Lebanon | 32 | 8.78 | 2.090 | 3 | 12 |
| Beqaa | 87 | 8.97 | 1.985 | 2 | 12 |
| North Lebanon | 63 | 8.95 | 2.067 | 2 | 12 |
| **Gender** | Male | 175 | 9.11 | 2.160 | 2 | 12 | 0.399 |
| Female | 167 | 8.98 | 2.001 | 2 | 12 |
| **Work** | Free work | 75 | 8.83 | 2.390 | 2 | 12 | 0.112 |
| Employee | 59 | 9.59 | 1.288 | 7 | 12 |
| Student | 6 | 10.67 | 1.506 | 8 | 12 |
| Homemaker | 119 | 8.88 | 2.072 | 2 | 12 |
| Unemployed | 34 | 9.09 | 2.563 | 3 | 12 |
| Retired | 49 | 8.92 | 1.956 | 4 | 12 |
| **Family history of hypertension** | No | 88 | 9.16 | 1.935 | 3 | 12 | 0.100 |
| Yes | 230 | 9.12 | 2.058 | 2 | 12 |
| Don't Know | 24 | 8.00 | 2.588 | 2 | 12 |
| **Smoking** | Never | 111 | 8.94 | 2.245 | 3 | 12 | 0.903 |
| Ex-smoker | 77 | 8.95 | 2.259 | 2 | 12 |
| Current smoker | 154 | 9.18 | 1.863 | 3 | 12 |
| **Alcohol** | Never | 232 | 9.05 | 2.090 | 2 | 12 | 0.526 |
| Ex-drinker | 39 | 9.38 | 1.886 | 4 | 12 |
| Current drinker | 71 | 8.86 | 2.160 | 3 | 12 |

P value significant <0.05

**Table S5: Factors Affecting HTN-Related Attitude Score (Bivariate analyses)**

| **Factors** | | **N** | **Mean** | **Std. Deviation** | **Minimum** | **Maximum** | **P.value** |
| --- | --- | --- | --- | --- | --- | --- | --- |
|
| **Nationality** | Lebanese | 336 | 30.50 | 3.33 | 21 | 35 | 0.051 |
| Syrian | 6 | 28.00 | 2.53 | 26 | 32 |
| **Gender** | Male | 175 | 30.59 | 3.356 | 21 | 35 | 0.355 |
| Female | 167 | 30.31 | 3.302 | 22 | 35 |
| **Marital Status** | Married | 261 | 30.55 | 3.441 | 21 | 35 | 0.566 |
| Single | 30 | 29.97 | 3.264 | 24 | 35 |
| Divorced | 10 | 30.40 | 3.340 | 27 | 35 |
| Widow | 41 | 30.20 | 2.629 | 25 | 34 |
| **Work** | Free work | 75 | 30.11 | 3.375 | 22 | 35 | 0.496 |
| Employee | 59 | 31.00 | 2.942 | 24 | 35 |
| Student | 6 | 31.33 | 2.422 | 27 | 33 |
| Homemaker | 119 | 30.13 | 3.371 | 22 | 35 |
| Unemployed | 34 | 30.82 | 3.713 | 21 | 35 |
| Retired | 49 | 30.76 | 3.394 | 24 | 35 |
| **Family history of hypertension** | No | 88 | 30.06 | 3.398 | 21 | 35 | 0.141 |
| Yes | 230 | 30.69 | 3.270 | 22 | 35 |
| Don't Know | 24 | 29.63 | 3.487 | 24 | 35 |
| **Alcohol** | Never | 232 | 30.63 | 3.246 | 21 | 35 | 0.292 |
| Ex-drinker | 39 | 30.38 | 3.639 | 22 | 35 |
| Current drinker | 71 | 29.92 | 3.405 | 22 | 35 |

P value significant <0.05

**Table S6: Factors Affecting HTN-Related Practice Score (Bivariate analyses)**

| **Factors** | | **N** | **Mean** | **Std. Deviation** | **Minimum** | **Maximum** | **P.value** |
| --- | --- | --- | --- | --- | --- | --- | --- |
|
| **Nationality** | Lebanese | 336 | 4.22 | 1.58 | 0 | 7 | 0.673 |
| Syrian | 6 | 3.83 | 2.04 | 1 | 6 |
| **Governorate** | Beirut | 45 | 4.31 | 1.345 | 1 | 7 | 0.795 |
| Mount Lebanon | 115 | 4.12 | 1.601 | 0 | 7 |
| South Lebanon | 20 | 4.70 | 1.490 | 1 | 7 |
| Nabatieh | 12 | 4.25 | 1.865 | 1 | 7 |
| Beqaa | 75 | 4.24 | 1.683 | 1 | 7 |
| Baalbeck El Hermel | 12 | 3.92 | 1.505 | 2 | 6 |
| North Lebanon | 37 | 4.30 | 1.730 | 1 | 7 |
| Akkar | 26 | 4.04 | 1.428 | 1 | 7 |
| **Governorate** | Beirut | 45 | 4.31 | 1.345 | 1 | 7 | 0.730 |
| Mount Lebanon | 115 | 4.12 | 1.601 | 0 | 7 |
| South Lebanon | 32 | 4.53 | 1.626 | 1 | 7 |
| Beqaa | 87 | 4.20 | 1.655 | 1 | 7 |
| North Lebanon | 63 | 4.19 | 1.605 | 1 | 7 |
| **Gender** | Male | 175 | 4.25 | 1.624 | 0 | 7 | 0.491 |
| Female | 167 | 4.18 | 1.542 | 1 | 7 |
| **Marital Status** | Married | 261 | 4.16 | 1.615 | 0 | 7 | 0.535 |
| Single | 30 | 4.47 | 1.332 | 1 | 7 |
| Divorced | 10 | 4.70 | 1.947 | 1 | 7 |
| Widow | 41 | 4.24 | 1.463 | 1 | 7 |
| **Educational Level** | Uneducated | 41 | 4.41 | 1.746 | 1 | 7 | 0.382 |
| Primary | 55 | 4.15 | 1.682 | 1 | 7 |
| Secondary | 78 | 4.22 | 1.364 | 0 | 7 |
| College | 84 | 4.00 | 1.575 | 1 | 7 |
| University | 61 | 4.21 | 1.654 | 1 | 7 |
| Master or equivalent | 18 | 4.67 | 1.534 | 2 | 7 |
| Doctorate or equivalent | 5 | 5.40 | 1.517 | 4 | 7 |
| **Work** | Free work | 75 | 4.20 | 1.542 | 1 | 7 | 0.177 |
| Employee | 59 | 4.25 | 1.708 | 1 | 7 |
| Student | 6 | 5.17 | .983 | 4 | 6 |
| Homemaker | 119 | 4.21 | 1.523 | 1 | 7 |
| Unemployed | 34 | 4.59 | 1.540 | 1 | 7 |
| Retired | 49 | 3.84 | 1.675 | 0 | 7 |
| **Duration of the beginning of hypertension** | 6 to 11 months | 17 | 4.53 | 1.841 | 1 | 7 | 0.456 |
| 1 to 5 years | 119 | 4.17 | 1.607 | 1 | 7 |
| 6 to 10 years | 68 | 3.97 | 1.611 | 1 | 7 |
| More than 10 years | 138 | 4.34 | 1.511 | 0 | 7 |
| **Family history of hypertension** | No | 88 | 4.38 | 1.592 | 0 | 7 | 0.427 |
| Yes | 230 | 4.13 | 1.579 | 1 | 7 |
| Don't Know | 24 | 4.42 | 1.586 | 1 | 7 |
| **Smoking** | Never | 111 | 4.31 | 1.512 | 1 | 7 | 0.515 |
| Ex-smoker | 77 | 4.25 | 1.607 | 1 | 7 |
| Current smoker | 154 | 4.14 | 1.625 | 0 | 7 |
| **Alcohol** | Never | 232 | 4.30 | 1.594 | 1 | 7 | 0.373 |
| Ex-drinker | 39 | 4.10 | 1.465 | 1 | 7 |
| Current drinker | 71 | 4.00 | 1.604 | 0 | 7 |

P value significant <0.05
